# Supplementary material
Source: PubMed Central journal article supplement (PMC5837608)
Supplement: dyw308_ije-2016-07-0809.pdf [file dyw308_ije-2016-07-0809.pdf]

Supplementary tables:

Table S1 Comparison of Raine Study cohort participants at 20 years with contemporaneous Western Australian Census population by gender

|                                     | Male  |      | Female |      | All   |      |
|-------------------------------------|-------|------|--------|------|-------|------|
|                                     | Raine | WA   | Raine  | WA   | Raine | WA   |
| <b>Family structure</b>             |       |      |        |      |       |      |
| Not married                         | 93    | 91.5 | 83.9   | 83.2 | 88.5  | 87.4 |
| De factor/married                   | 7     | 8.5  | 16.2   | 16.8 | 11.6  | 12.7 |
| Any children                        | -     | -    | 8.6    | 2.4  | 4.3   | 1.2  |
| <b>Education</b>                    |       |      |        |      |       |      |
| Secondary > year10                  | 80.4  | 85   | 86.1   | 90.8 | 83.25 | 87.9 |
| Post-secondary/<br>tertiary study   | 18.2  | 26.2 | 24.9   | 27.8 | 45.7  | 56.8 |
| <b>Labour force/<br/>occupation</b> |       |      |        |      |       |      |
| Professional/<br>managerial##       | 3.8   | 7.2  | 4.5    | 9.2  | 8.3   | 4.1  |
| Clerical/retail##                   | 59.3  | 26.1 | 53.3   | 74.9 | 51.2  | 52.8 |
| Technical/trade/<br>labour##        | 37.0  | 64.9 | 41.9   | 14.9 | 40.6  | 43.3 |
| Not in labour force#                | 19.3  | 25.6 | 15.9   | 27.6 | 21    | 8.3  |
| Unemployed                          |       |      |        |      | 7.4   | 10.1 |
| <b>Work hours per week</b>          |       |      |        |      |       |      |
| <40                                 | 55.3  | 63   | 77.8   | 83.9 | 66.6  | 73.5 |
| 40+                                 | 44.7  | 37   | 22.2   | 16.1 | 33.5  | 26.6 |
| <b>Income levels</b>                |       |      |        |      |       |      |
| Low                                 | 16.6  | 15.1 | 20.3   | 21.9 | 18.5  | 18.5 |
| Medium                              | 41.4  | 39.4 | 51.4   | 46.6 | 46.4  | 43   |
| High                                | 42    | 45.5 | 28.4   | 31.4 | 35.2  | 38.5 |

## out of total % in labour force; # by choice

Table S2 Comparison of Raine Study cohort participants at 22 years with contemporaneous Western Australian Census population by gender

|                                     | Male  |      | Female |      | All   |      |
|-------------------------------------|-------|------|--------|------|-------|------|
|                                     | Raine | WA   | Raine  | WA   | Raine | WA   |
| <b>Family structure</b>             |       |      |        |      |       |      |
| Not married                         | 84.4  | 82.8 | 70.9   | 73.2 | 77.7  | 78   |
| De factor/married                   | 15.6  | 17.2 | 29.1   | 26.8 | 22.4  | 22   |
| Any children                        | 15    | 5.1  | 11.8   | 3.75 | 7.5   | 2.6  |
| <b>Education</b>                    |       |      |        |      |       |      |
| Secondary > year10                  | 81    | 85.2 | 85.4   | 91.1 | 83.2  | 88.2 |
| Post-secondary/<br>tertiary study   | 37.0  | 45.1 | 43.3   | 47.9 | 31.7  | 46   |
| <b>Labour force/<br/>occupation</b> |       |      |        |      |       |      |
| Professional/<br>managerial##       | 16.0  | 14.3 | 17.5   | 21.9 | 18.3  | 16.3 |
| Clerical/retail##                   | 35.9  | 21.7 | 69.9   | 63.4 | 43    | 52.5 |
| Technical/trade/<br>labour##        | 49.1  | 62.6 | 12.6   | 13.8 | 38.6  | 31.4 |
| Not in labour force#                | 22.1  | 21.0 | 16.6   | 26.6 | 19.2  | 7.4  |
| Unemployed                          |       |      |        |      | 6.35  | 9.4  |
| <b>Work hours per week</b>          | 45.9  | 56.7 | 65.8   | 73.6 |       |      |
| <40                                 | 54.1  | 43.4 | 34.2   | 26.3 | 55.9  | 65.2 |
| 40+                                 |       |      |        |      | 44.2  | 34.9 |
| <b>Income levels</b>                | 37.4  | 57.9 | 51.1   | 46   |       |      |
| Low                                 | 31.4  | 36.3 | 33.9   | 34.6 | 44.3  | 52.0 |
| Medium                              | 31.2  | 5.8  | 15     | 19.4 | 32.7  | 35.5 |
| High                                | 84.4  | 82.8 | 70.9   | 73.2 | 23.1  | 12.6 |

## out of total % in labour force; # by choice
